# Supplementary material
Source: HighWire-hosted journal article supplement (https://bmjopen.bmj.com/content/11/10/e048488)
Supplement: inline-supplementary-material-1 [file inline-supplementary-material-1.pdf]

## APPENDIX – Supplementary Tables and Figures

**TABLE 1 – Morbidity vignette answers (n=599).**

| Item               | Doctor alone | Mostly the doctor | Doctor and you equally | Mostly you | You alone |
|--------------------|--------------|-------------------|------------------------|------------|-----------|
| Diagnosis          | 351 (58.6)   | 109 (18.2)        | 120 (20.0)             | 9 (1.5)    | 10 (1.7)  |
| Options            | 459 (76.6)   | 113 (18.9)        | 25 (4.2)               | 1 (0.2)    | 1 (0.2)   |
| Risks and Benefits | 430 (71.8)   | 113 (18.9)        | 53 (8.8)               | 1 (0.2)    | 2 (0.3)   |
| Probability        | 376 (62.8)   | 132 (22.0)        | 78 (13.0)              | 5 (0.8)    | 8 (1.3)   |
| Utility            | 257 (42.9)   | 106 (17.7)        | 182 (30.4)             | 32 (5.3)   | 22 (3.7)  |
| What is Done       | 238 (39.7)   | 103 (17.2)        | 184 (30.7)             | 47 (7.8)   | 27 (4.5)  |

**TABLE 2 – Mortality vignette answers (n=599).**

| Item               | Doctor alone | Mostly the doctor | Doctor and you equally | Mostly you | You alone |
|--------------------|--------------|-------------------|------------------------|------------|-----------|
| Diagnosis          | 423 (70.6)   | 113 (18.9)        | 55 (9.2)               | 4 (0.7)    | 4 (0.7)   |
| Options            | 473 (79.0)   | 110 (18.4)        | 14 (2.3)               | 2 (0.3)    | 0 (0.0)   |
| Risks and Benefits | 435 (72.6)   | 119 (19.9)        | 40 (6.7)               | 1 (0.2)    | 4 (0.7)   |
| Probability        | 405 (67.6)   | 118 (19.7)        | 66 (11.0)              | 6 (1.0)    | 4 (0.7)   |
| Utility            | 273 (45.6)   | 104 (17.4)        | 161 (26.9)             | 41 (6.8)   | 20 (3.3)  |
| What is Done       | 250 (41.7)   | 102 (17.0)        | 176 (29.4)             | 43 (7.2)   | 28 (4.7)  |

**TABLE 3 – Quality of life vignette answers (n=599).**

| Item               | Doctor alone | Mostly the doctor | Doctor and you equally | Mostly you | You alone |
|--------------------|--------------|-------------------|------------------------|------------|-----------|
| Diagnosis          | 373 (62.3)   | 121 (20.2)        | 86 (14.4)              | 15 (2.5)   | 4 (0.7)   |
| Options            | 427 (71.3)   | 122 (20.4)        | 46 (7.7)               | 4 (0.7)    | 0 (0.0)   |
| Risks and Benefits | 408 (68.1)   | 125 (20.9)        | 60 (10.0)              | 5 (0.8)    | 1 (0.2)   |
| Probability        | 367 (61.3)   | 131 (21.9)        | 85 (14.2)              | 13 (2.2)   | 3 (0.5)   |
| Utility            | 228 (38.1)   | 80 (13.4)         | 176 (29.4)             | 59 (9.8)   | 56 (9.3)  |
| What is Done       | 197 (32.9)   | 83 (13.9)         | 192 (32.1)             | 65 (10.9)  | 62 (10.4) |

**TABLE 4 – Mean scores on Problem-Solving Decision-Making scale between 1 (doctor alone) and 5 (you alone) (n = 599).**

| Vignette        | Problem-Solving Tasks |         |                    | Decision-Making Tasks |         |              |
|-----------------|-----------------------|---------|--------------------|-----------------------|---------|--------------|
|                 | Diagnosis             | Options | Risks and Benefits | Probability           | Utility | What is Done |
| Morbidity       | 1.69                  | 1.28    | 1.38               | 1.56                  | 2.09    | 2.20         |
| Mortality       | 1.42                  | 1.24    | 1.36               | 1.47                  | 2.05    | 2.16         |
| Quality of life | 1.59                  | 1.38    | 1.44               | 1.59                  | 2.39    | 2.52         |

**TABLE 5 – Distribution of Problem-Solving Decision-Making scale scores by control category for the 3 vignettes together (the variables were defined based on the mean scores over the three vignettes).**

|                      | Control categories, % |           |             |
|----------------------|-----------------------|-----------|-------------|
|                      | Hand over (<3)        | Share (3) | Retain (>3) |
| Problem-solving (PS) |                       |           |             |
| Diagnosis            | 92.3                  | 6.0       | 1.7         |
| Options              | 98.7                  | 1.2       | 0.2         |
| Risks and Benefits   | 95.5                  | 4.0       | 0.5         |
| Probability          | 92.8                  | 5.3       | 1.8         |
| Average-PS           | 99.3                  | 0.3       | 0.3         |
| Decision-making (DM) |                       |           |             |
| Utility              | 67.6                  | 13.0      | 19.4        |
| What is Done         | 62.1                  | 16.2      | 21.7        |
| Average-DM           | 68.9                  | 9.8       | 21.2        |

**TABLE 6 – Preferred roles categories.**

| Responsibility for Decision-making | Responsibility for Problem-solving |                             |                             |
|------------------------------------|------------------------------------|-----------------------------|-----------------------------|
|                                    | Hand over (<3)                     | Share (≥ 3 and < 4)         | Keep (≥ 4)                  |
| Hand over (<3)                     | Passive                            | Theoretically implausible   | Theoretically implausible   |
|                                    | 413 (68.9)                         | 0 (0.0)                     | 0 (0.0)                     |
| Share (≥ 3 and < 4)                | Shared (leaning passive)           | Shared (equally)            | Autonomous (leaning shared) |
|                                    | 143 (23.9)                         | 3 (0.5)                     | 0 (0.0)                     |
| Keep (≥ 4)                         | Shared (divide and share)          | Shared (leaning autonomous) | Autonomous (consumerist)    |
|                                    | 39 (6.5)                           | 1 (0.2)                     | 0 (0.0)                     |

**TABLE 7 – Preferred roles categories proportion of scores of the 3 vignettes (n=599)**

| Preferred role            | Morbidity vignette | Mortality vignette | Quality of life vignette |
|---------------------------|--------------------|--------------------|--------------------------|
| Passive                   | 386 (64.4)         | 396 (66.1)         | 332 (55.4)               |
| Shared (total)            | 205 (34.2)         | 201 (33.5)         | 266 (44.3)               |
| • Leaning passive         | 145 (24.2)         | 139 (23.2)         | 136 (22.7)               |
| • Shared equally          | 7 (1.2)            | 2 (0.3)            | 17 (2.8)                 |
| • Leaning autonomous      | 3 (0.5)            | 4 (0.7)            | 8 (1.3)                  |
| • Divide and share        | 50 (8.3)           | 56 (9.3)           | 105 (17.5)               |
| Autonomous (total)        | 0 (0.0)            | 0 (0.0)            | 1 (0.2)                  |
| • Leaning shared          | 0 (0.0)            | 0 (0.0)            | 0 (0.0)                  |
| • Autonomous/consumerist  | 0 (0.0)            | 0 (0.0)            | 1 (0.2)                  |
| Theoretically implausible | 8 (1.3)            | 2 (0.3)            | 0 (0.0)                  |

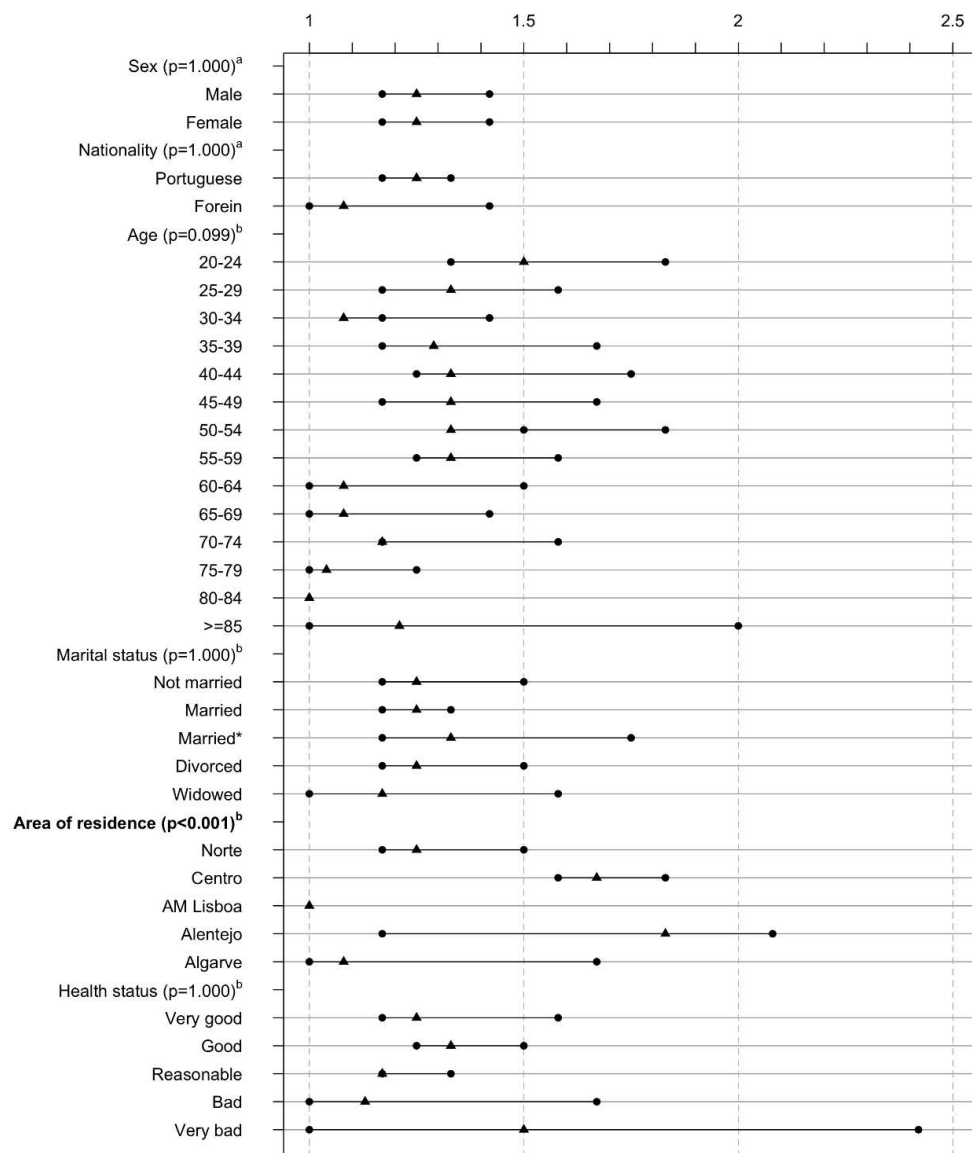

FIGURE 1: PREFERENCE VARIATIONS ACCORDING SOCIODEMOGRAPHIC CHARACTERISTICS IN PROBLEM-SOLVING COMPONENT. A: MANN-WHITNEY TEST. B: KRUSKAL-WALLIS TEST. \*: MARRIED IN THE SITUATION LEGALLY SEPARATED FROM PERSONS AND PROPERTY. SIGNIFICANT P VALUES ARE IN BOLD.

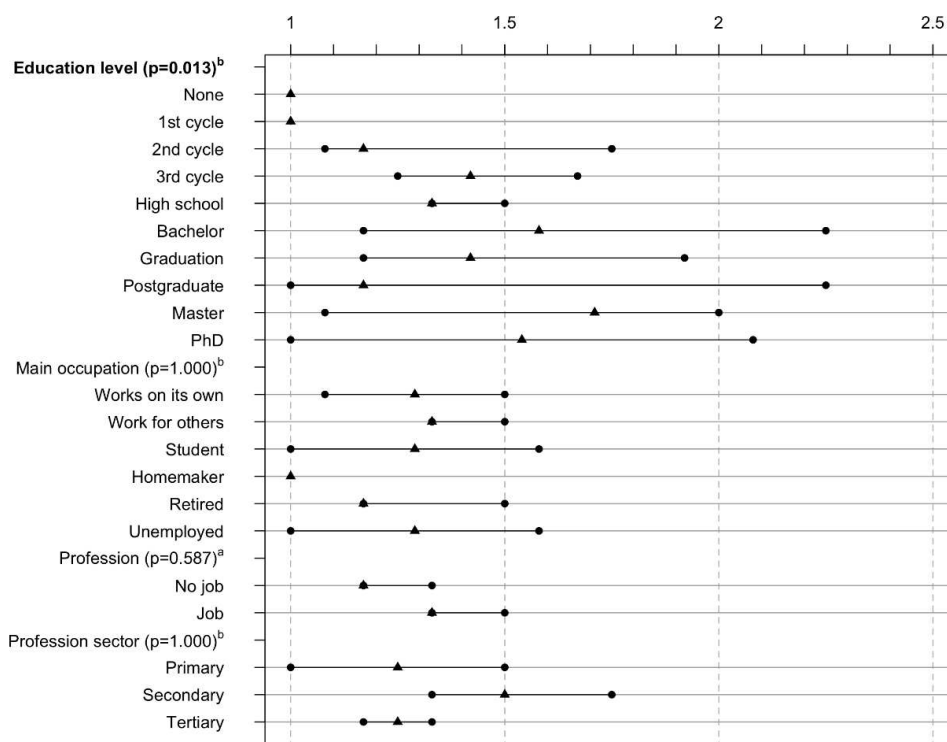

FIGURE 2: PREFERENCE VARIATIONS ACCORDING SOCIODEMOGRAPHIC CHARACTERISTICS IN PROBLEM-SOLVING COMPONENT. A: MANN-WHITNEY TEST. B: KRUSKAL-WALLIS TEST. SIGNIFICANT P VALUES ARE IN BOLD.

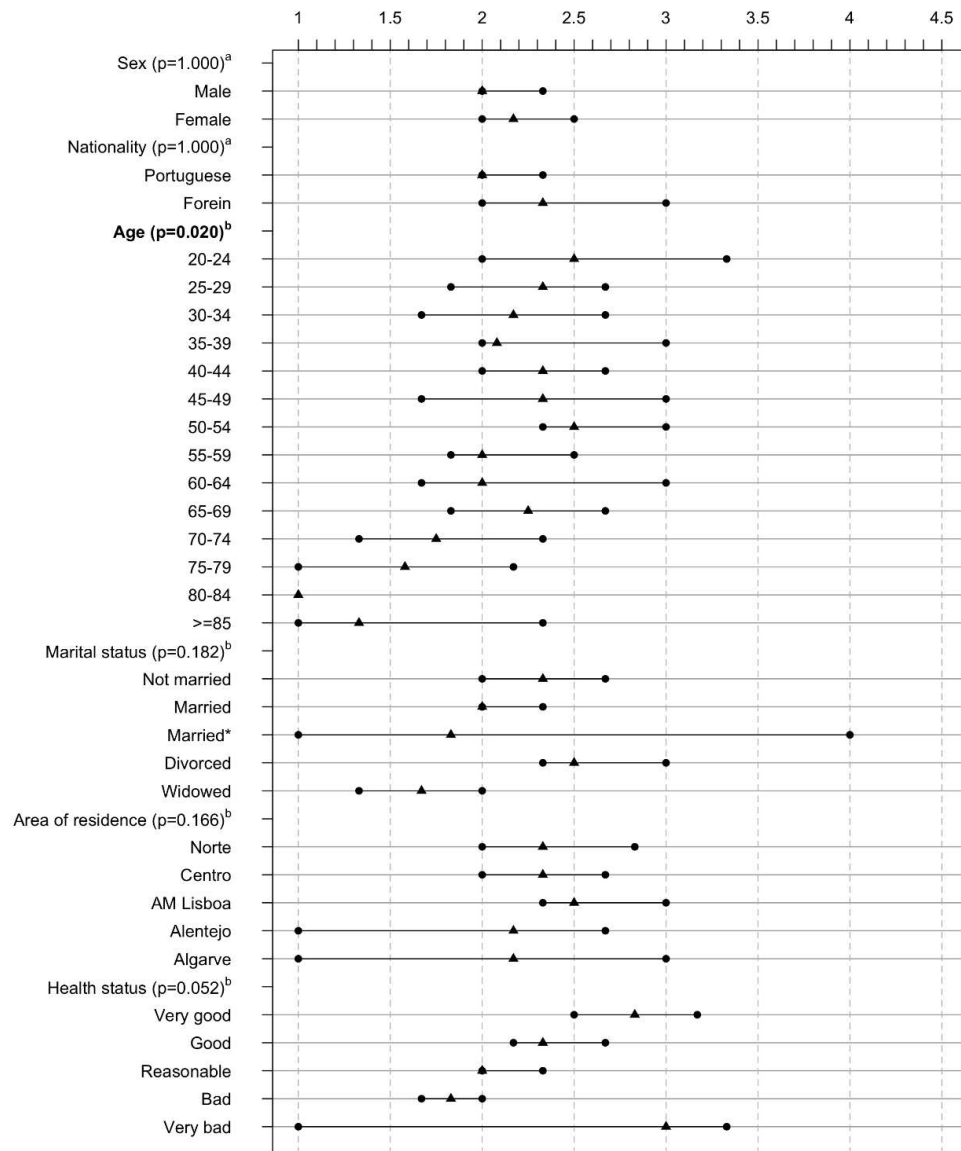

FIGURE 3: PREFERENCE VARIATIONS ACCORDING SOCIODEMOGRAPHIC CHARACTERISTICS IN DECISION-MAKING COMPONENT. A: MANN-WHITNEY TEST. B: KRUSKAL-WALLIS TEST. \*: MARRIED IN THE SITUATION LEGALLY SEPARATED FROM PERSONS AND PROPERTY. SIGNIFICANT P VALUES ARE IN BOLD.

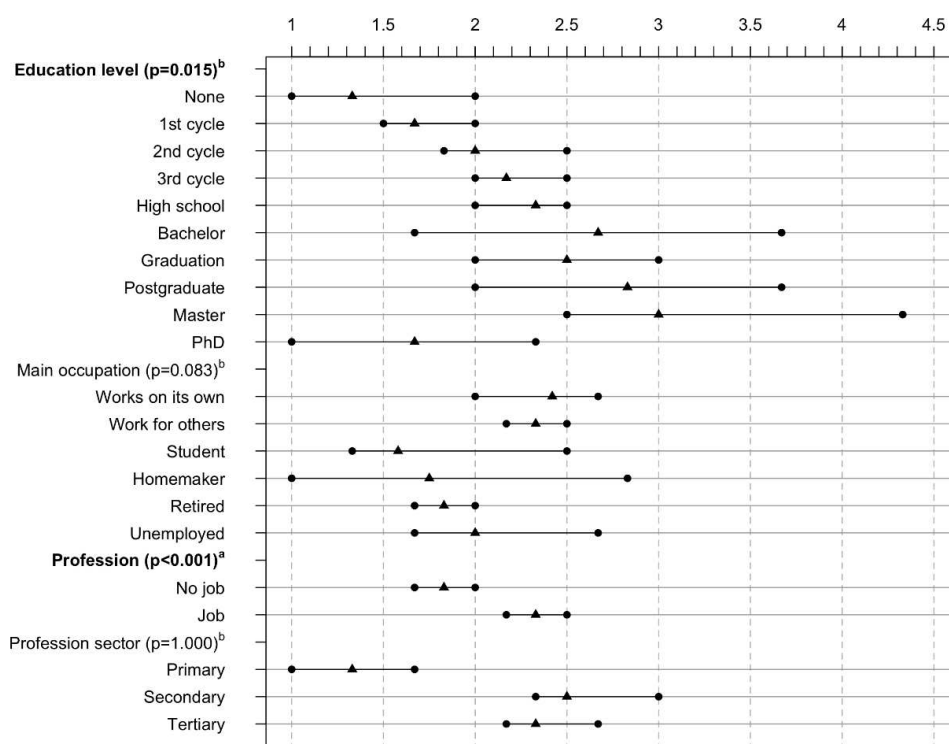

FIGURE 4: PREFERENCE VARIATIONS ACCORDING SOCIODEMOGRAPHIC CHARACTERISTICS IN DECISION-MAKING COMPONENT. A: MANN-WHITNEY TEST. B: KRUSKAL-WALLIS TEST. SIGNIFICANT P VALUES ARE IN BOLD.
